# Supplementary material for: A single-cell atlas of the cycling murine ovary
Source: eLife. 2022 Oct 7;11:e77239. doi: 10.7554/eLife.77239 (PMC9545525; doi:10.7554/eLife.77239)
Supplement: Source data 1. [file elife-77239-data1.xlsx]

## Sheet: Sheet1
N = number of mouse at different stages of the Estrous cycle
Stage	Proestrus	Estrus	Metestrus	Diestrus
N	5	5	4	4
Figure 6- D
Unpaired Student's t test
	ACTIVIN A	PRSS35	TINAGL1	NPPC
P vs. E	0.9264	0.2751	0.0758	0.5786
P vs. M	0.1492	0.0404	0.0142	0.1678
P vs. D	0.0312	0.8879	0.8451	0.1792
E vs. M	0.1492	0.1222	0.4749	0.0889
E vs. D	0.0231	0.13	0.0828	0.1256
M vs. D	0.003	0.0009	0.0165	0.7019
