# Supplementary material for: A single-cell atlas of the cycling murine ovary
Source: eLife. 2022 Oct 7;11:e77239. doi: 10.7554/eLife.77239 (PMC9545525; doi:10.7554/eLife.77239)
Supplement: Source data 2. [file elife-77239-data2.xlsx]

## Sheet: Sheet1
N = number of mouse at different stages of the Estrous cycle
Stage	Proestrus	Estrus	Metestrus	Diestrus
N	5	5	4	4
Figure 5-E
Ordinary one way ANOVA - Comparing the mean of each conditions together
	Sgk1	Cyp19a1	Rgcc	Trib2	Star
P vs. E	p=0.1488	p=0.0029	p=0.0441	p=0.0023	p=0.0187
P vs. M	p=0.0056	p=0.0081	p=0.9853	p=0.0073	p=0.9401
P vs. D	p=0.0727	p=0.0654	p=0.8813	p=0.0233	p=0.5176
E vs. M	p=0.3411	p=0.9903	p=0.1024	p=0.9817	p=0.0679
E vs. D	p=0.9771	p=0.5132	p=0.1877	p=0.9116	p=0.2495
M vs. D	p=0.5536	p=0.7211	p=0.9819	p=0.9901	p=0.8552
Figure S5-C
Ordinary one way ANOVA - Comparing the mean of each conditions together
	Jun	Egr1	Fos	Junb
P/E	0.0022	0.608	0.2727	0.2708
P/M	0.0198	0.9997	0.4105	0.9997
P/D	0.0817	0.2961	0.9316	0.1675
E/M	0.7102	0.5932	0.9974	0.3124
E/D	0.0001	0.0504	0.1258	0.0069
M/D	0.0007	0.371	0.2063	0.1453
Figure 6-B
Ordinary one way ANOVA - Comparing the mean of each conditions together
	Lhcgr	Pgr	Inhba	Prss35	Nppc	Tinagl1
P/E	p=0.6565	p=0.0096	p=0.0067	p=0.0008	p=0.0022	p=0.0081
P/M	p=0.1626	p=0.9406	p=0.0942	p=0.9764	p=0.0062	p=0.9489
P/D	p=0.9898	p=0.2974	p=0.6264	p=0.9764	p=0.0314	p=0.811
E/M	p=0.0281	p=0.0365	p=0.5256	p=0.0031	p>0.9999	p=0.034
E/D	p=0.5185	p=0.2765	p=0.0788	p=0.0031	p=0.8081	p=0.0651
M/D	p=0.2833	p=0.6293	p=0.5877	p>0.9999	p=0.8377	p=0.9865
